# Supplementary material for: Microtubules orchestrate local translation to enable cardiac growth
Source: PubMed Central journal article supplement (PMC7952726; doi:10.1038/s41467-021-21685-4), 2021-03-11
Supplement: 41467_2021_21685_MOESM3_ESM.pdf [file 41467_2021_21685_MOESM3_ESM.pdf]

## Reporting Summary

Nature Research wishes to improve the reproducibility of the work that we publish. This form provides structure for consistency and transparency in reporting. For further information on Nature Research policies, see our [Editorial Policies](#) and the [Editorial Policy Checklist](#).

### Statistics

For all statistical analyses, confirm that the following items are present in the figure legend, table legend, main text, or Methods section.

n/a Confirmed

- The exact sample size ( $n$ ) for each experimental group/condition, given as a discrete number and unit of measurement
- A statement on whether measurements were taken from distinct samples or whether the same sample was measured repeatedly
- The statistical test(s) used AND whether they are one- or two-sided  
*Only common tests should be described solely by name; describe more complex techniques in the Methods section.*
- A description of all covariates tested
- A description of any assumptions or corrections, such as tests of normality and adjustment for multiple comparisons
- A full description of the statistical parameters including central tendency (e.g. means) or other basic estimates (e.g. regression coefficient) AND variation (e.g. standard deviation) or associated estimates of uncertainty (e.g. confidence intervals)
- For null hypothesis testing, the test statistic (e.g.  $F$ ,  $t$ ,  $r$ ) with confidence intervals, effect sizes, degrees of freedom and  $P$  value noted  
*Give  $P$  values as exact values whenever suitable.*
- For Bayesian analysis, information on the choice of priors and Markov chain Monte Carlo settings
- For hierarchical and complex designs, identification of the appropriate level for tests and full reporting of outcomes
- Estimates of effect sizes (e.g. Cohen's  $d$ , Pearson's  $r$ ), indicating how they were calculated

*Our web collection on [statistics for biologists](#) contains articles on many of the points above.*

### Software and code

Policy information about [availability of computer code](#)

Data collection

Image collection and Airyscan processing was performed using Zen Black software (Zeiss, Version 14.0.15.201). Image collection (NRVM smFISH data only) and deconvolution was performed using Zen Blue software (Zeiss, Version 2.5). LICOR Image studio (Version 5.2) was used to image western blots. QuantStudio 3 (Version v1.4.1) was used to collect qPCR amplification data.

Data analysis

ImageJ (Version 1.52n) was used for quantification of microscopy images. Image studio lite (Version 5.2) was used for western blot quantification. OriginPro (Version 2019, academic) was used for graphing and statistical analysis.

For manuscripts utilizing custom algorithms or software that are central to the research but not yet described in published literature, software must be made available to editors and reviewers. We strongly encourage code deposition in a community repository (e.g. GitHub). See the Nature Research [guidelines for submitting code & software](#) for further information.

### Data

Policy information about [availability of data](#)

All manuscripts must include a [data availability statement](#). This statement should provide the following information, where applicable:

- Accession codes, unique identifiers, or web links for publicly available datasets
- A list of figures that have associated raw data
- A description of any restrictions on data availability

Source data files are provided for all source data. Additional data that support the findings of this study are available from the corresponding author upon reasonable request.

## Field-specific reporting

Please select the one below that is the best fit for your research. If you are not sure, read the appropriate sections before making your selection.

- Life sciences       Behavioural & social sciences       Ecological, evolutionary & environmental sciences

For a reference copy of the document with all sections, see [nature.com/documents/nr-reporting-summary-flat.pdf](https://www.nature.com/documents/nr-reporting-summary-flat.pdf)

## Life sciences study design

All studies must disclose on these points even when the disclosure is negative.

|                 |                                                                                                                                                                                                                                                                                           |
|-----------------|-------------------------------------------------------------------------------------------------------------------------------------------------------------------------------------------------------------------------------------------------------------------------------------------|
| Sample size     | After a preliminary cohort was used to estimate variability, a power analysis was performed to estimate the number of additional mice necessary to complete the in vivo mouse studies. For imaging experiments, a sufficient number of cells were imaged to observe a clear distribution. |
| Data exclusions | One colchicine-injected mouse was excluded from the in vivo mouse hypertrophy study due to excessive weight loss.                                                                                                                                                                         |
| Replication     | All experiments were reproduced, typically in triplicate, and the number of biological replicates for each experiment are noted. Replication attempts were successful.                                                                                                                    |
| Randomization   | Mice were randomly allocated based on the order that they were tagged for identification.                                                                                                                                                                                                 |
| Blinding        | Blinding was deemed unproductive as investigators could readily identify experimental groups based on stark phenotypes. As such, unbiased analytical approaches were used whenever possible to limit investigator bias.                                                                   |

## Reporting for specific materials, systems and methods

We require information from authors about some types of materials, experimental systems and methods used in many studies. Here, indicate whether each material, system or method listed is relevant to your study. If you are not sure if a list item applies to your research, read the appropriate section before selecting a response.

### Materials & experimental systems

| n/a                                 | Involved in the study                                           |
|-------------------------------------|-----------------------------------------------------------------|
| <input type="checkbox"/>            | <input checked="" type="checkbox"/> Antibodies                  |
| <input checked="" type="checkbox"/> | <input type="checkbox"/> Eukaryotic cell lines                  |
| <input checked="" type="checkbox"/> | <input type="checkbox"/> Palaeontology and archaeology          |
| <input type="checkbox"/>            | <input checked="" type="checkbox"/> Animals and other organisms |
| <input type="checkbox"/>            | <input checked="" type="checkbox"/> Human research participants |
| <input checked="" type="checkbox"/> | <input type="checkbox"/> Clinical data                          |
| <input checked="" type="checkbox"/> | <input type="checkbox"/> Dual use research of concern           |

### Methods

| n/a                                 | Involved in the study                           |
|-------------------------------------|-------------------------------------------------|
| <input checked="" type="checkbox"/> | <input type="checkbox"/> ChIP-seq               |
| <input checked="" type="checkbox"/> | <input type="checkbox"/> Flow cytometry         |
| <input checked="" type="checkbox"/> | <input type="checkbox"/> MRI-based neuroimaging |

## Antibodies

### Antibodies used

Alpha-tubulin rabbit polyclonal (Millipore Sigma, SAB3501072-100UG);  
 Tubulin (DM1A) mouse monoclonal (Cell Signaling Technology, 3873S);  
 Desmin rabbit polyclonal (ThermoFisher, PA5-16705);  
 Kif5b rabbit monoclonal (Abcam, ab167429);  
 Rps6 (clone 54D2) mouse monoclonal (Cell Signaling Technology, 2317S);  
 Puromycin (clone 12D10) mouse monoclonal (Millipore Sigma, MABE343);  
 GAPDH rabbit polyclonal (Biolegend, Poly 6314);  
 Histone H3 rabbit polyclonal (Abcam, ab1791);  
 GAPDH mouse monoclonal (VWR, A01622-40);  
 Histone H3 mouse monoclonal (Abcam, ab24834);  
 Goat anti-rabbit IgG AF 647 (Life Technologies, A27040);  
 Goat anti-mouse IgG AF 488 (Life Technologies, A11001)

### Validation

Alpha-tubulin rabbit polyclonal (Millipore Sigma, SAB3501072-100UG);  
 Tubulin (DM1A) mouse monoclonal (Cell Signaling Technology, 3873S); 360 citations on Citeab, orthogonal validation <https://www.cellsignal.co.uk/products/primary-antibodies/a-tubulin-dm1a-mouse-mab/3873?N=0+4294956287&Nrpp=200&No=5800&fromPage=plp>  
 Desmin rabbit polyclonal (ThermoFisher, PA5-16705); Knockdown validated in Heffler et al. [PMID: 3182208]  
 Kif5b rabbit monoclonal (Abcam, ab167429); Knockdown validated in this manuscript

Rps6 (clone 54D2) mouse monoclonal (Cell Signaling Technology, 23175);444 citations on Citeab <https://www.citeab.com/antibodies/123215-2317-s6-ribosomal-protein-54d2-mouse-mab?des=4d8d40dfcb3076c5>, Knockdown validated in Yano et al [PMID: 24557881]  
 Puromycin (clone 12D10) mouse monoclonal (Millipore Sigma, MABE343);Validated using no puromycin negative control GAPDH rabbit polyclonal (Biolegend, Poly 6314);  
 Histone H3 rabbit polyclonal (Abcam, ab1791); Nuclear loading control and ChIP grade, 3328 citations on Citeab <https://www.citeab.com/antibodies/763778-ab1791-anti-histone-h3-antibody-nuclear-loading-con?des=dbc569e5ef3eab3a>  
 GAPDH mouse monoclonal (VWR, A01622-40);  
 Histone H3 mouse monoclonal (Abcam, ab24834);Nuclear loading control and ChIP grade, 35 citations on Citeab <https://www.citeab.com/antibodies/763782-ab24834-anti-histone-h3-antibody-mabcam-24834-nuc?des=e1608f0371daaa69>

## Animals and other organisms

Policy information about [studies involving animals](#); [ARRIVE guidelines](#) recommended for reporting animal research

|                         |                                                                                                                                                                                                                                                                                                                                                                                           |
|-------------------------|-------------------------------------------------------------------------------------------------------------------------------------------------------------------------------------------------------------------------------------------------------------------------------------------------------------------------------------------------------------------------------------------|
| Laboratory animals      | 8-12 week old, male Sprague Dawley rats were used for the isolation of primary adult ventricular myocytes; 1-2 day old litters (both male and female) of Sprague-Dawley rats were used to isolate neonatal ventricular myocytes; 8-12 week old male C57BL/6 wild type mice were used for <i>in vivo</i> colchicine and phenylephrine treatments                                           |
| Wild animals            | No wild animals were used in this study.                                                                                                                                                                                                                                                                                                                                                  |
| Field-collected samples | No field-collected samples were used in this study.                                                                                                                                                                                                                                                                                                                                       |
| Ethics oversight        | Animal care and use procedures were performed in accordance with the standards set forth by the University of Pennsylvania Institutional Animal Care and Use Committee and the Guide for the Care and Use of Laboratory Animals published by the US National Institutes of Health; protocols were approved by the University of Pennsylvania Institutional Animal Care and Use Committee. |

Note that full information on the approval of the study protocol must also be provided in the manuscript.

## Human research participants

Policy information about [studies involving human research participants](#)

|                            |                                                                                                                                                                                                                                                                                                                                                                                         |
|----------------------------|-----------------------------------------------------------------------------------------------------------------------------------------------------------------------------------------------------------------------------------------------------------------------------------------------------------------------------------------------------------------------------------------|
| Population characteristics | One human heart sample was used in this study: 64 year old Caucasian male with a BMI of 28.9, with history of one myocardial infarction in 1995 and hypertension.                                                                                                                                                                                                                       |
| Recruitment                | Hearts are procured through cadaveric donation when organs are not suitable for transplantation. Non-failing donor hearts are characterized by having a left ventricle ejection fraction greater than 50%.                                                                                                                                                                              |
| Ethics oversight           | Procurement of human myocardial tissue was performed under protocols and ethical regulations approved by Institutional Review Boards at the University of Pennsylvania and the Gift-of-Life Donor Program (Pennsylvania, USA). Informed consent was obtained from subjects or relatives. Human studies were conducted in compliance with the principles of the Declaration of Helsinki. |

Note that full information on the approval of the study protocol must also be provided in the manuscript.
